# Supplementary material for: Preparation of cellulose and pulp carbamates through a reactive dissolution approach
Source: Royal Society of Chemistry journal article supplement (doi:10.1039/c4ra02316a), 2014-01-01
Supplement: c4ra02316a1.pdf [file c4ra02316a1.pdf]

## Supporting Information

### **Preparation of cellulose and pulp carbamates through a reactive dissolution approach**

Sara R. Labafzadeh,\* Jari S. Kavakka, Kashmira Vyavaharkar, Katja Sievänen, and Ilkka Kilpeläinen

*Laboratory of Organic Chemistry, Department of Chemistry, University of Helsinki, P.O.Box 55, FIN-00014, Helsinki*

Corresponding author: Email: [Sara.labaf@helsinki.fi](mailto:Sara.labaf@helsinki.fi), [Tel:+358\(0\)919150115](tel:+3580919150115)

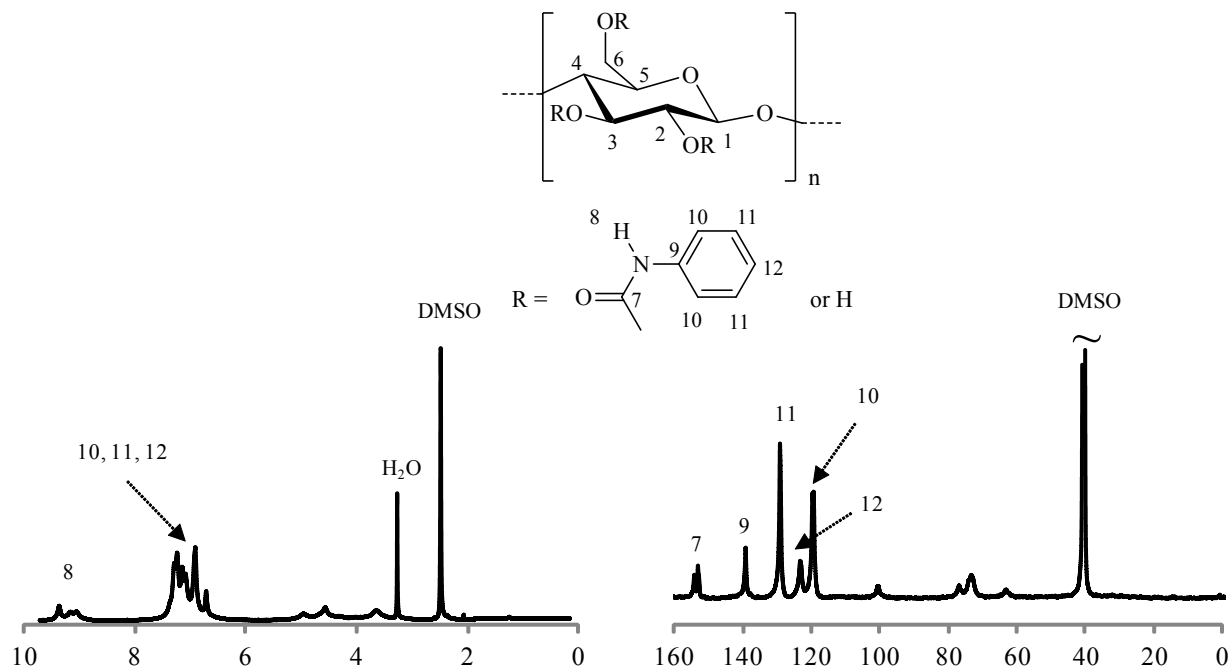

**Fig. 1**  $^1\text{H}$  and  $^{13}\text{C}$  NMR spectrum of treated MCC with phenyl isocyanate.

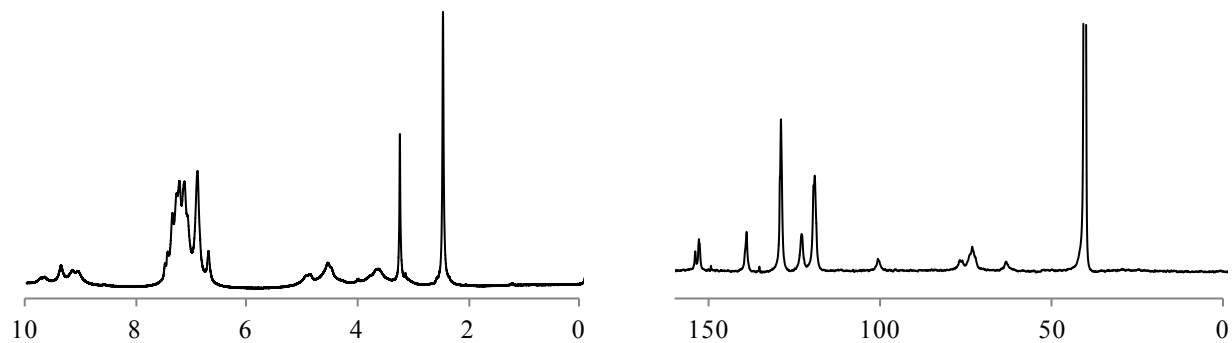

**Fig. 1a**  $^1\text{H}$  and  $^{13}\text{C}$  NMR spectrum of treated HKP with phenyl isocyanate.

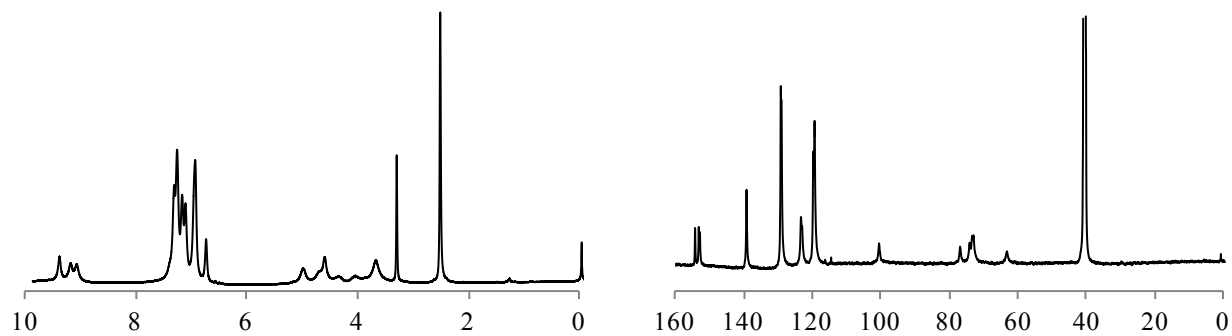

**Fig. 1b**  $^1\text{H}$  and  $^{13}\text{C}$  NMR spectrum of treated HPHKP with phenyl isocyanate.

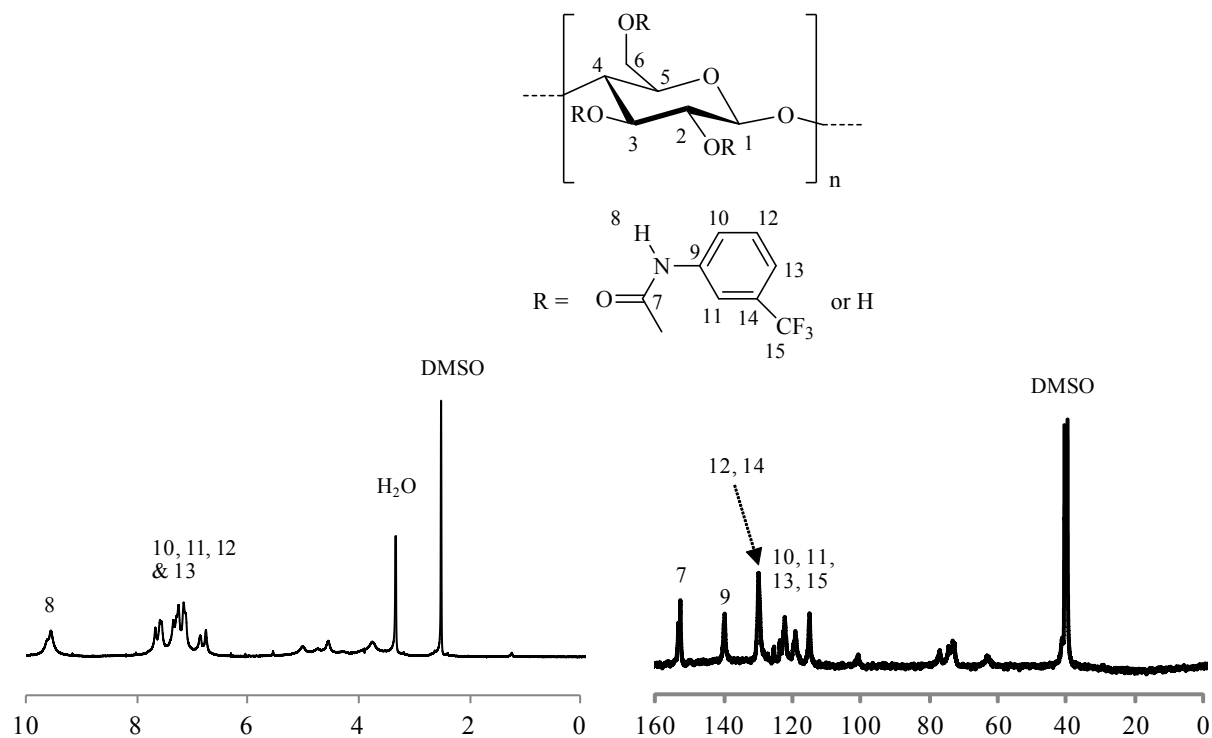

**Fig. 2**  $^1\text{H}$  and  $^{13}\text{C}$  NMR spectrum of treated MCC with 3-(trifluoromethyl)phenyl isocyanate.

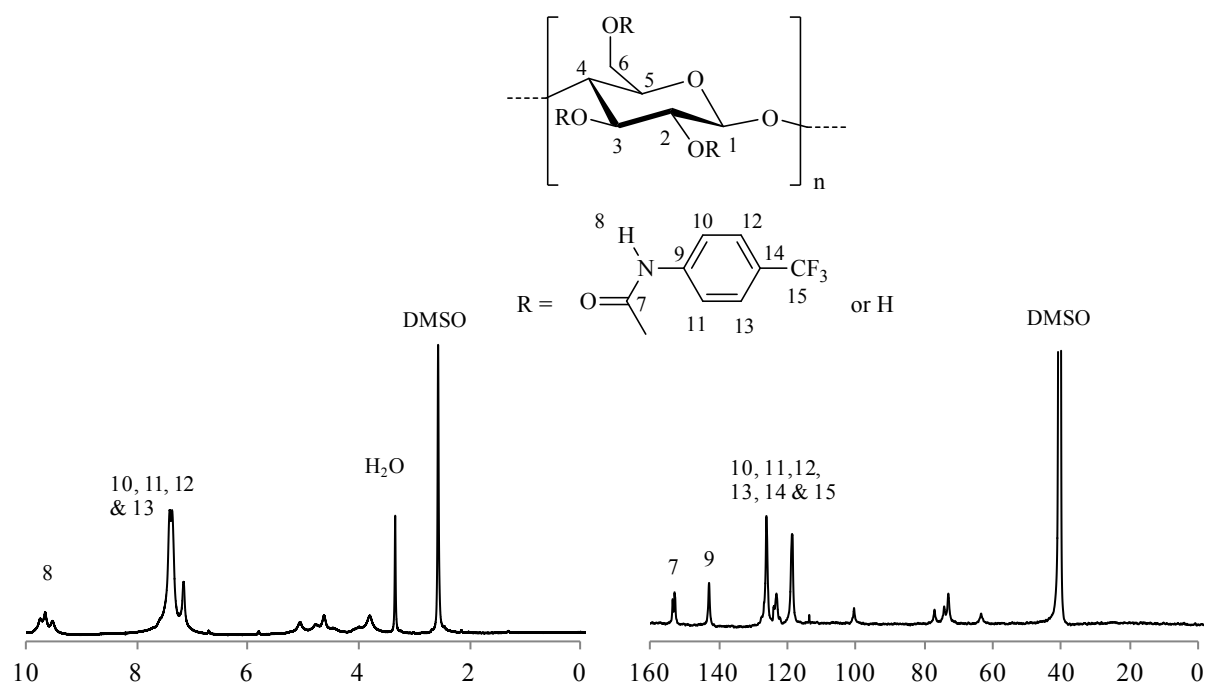

**Fig. 3**  $^1\text{H}$  and  $^{13}\text{C}$  NMR spectrum of treated MCC with 4-(trifluoromethyl)phenyl isocyanate.

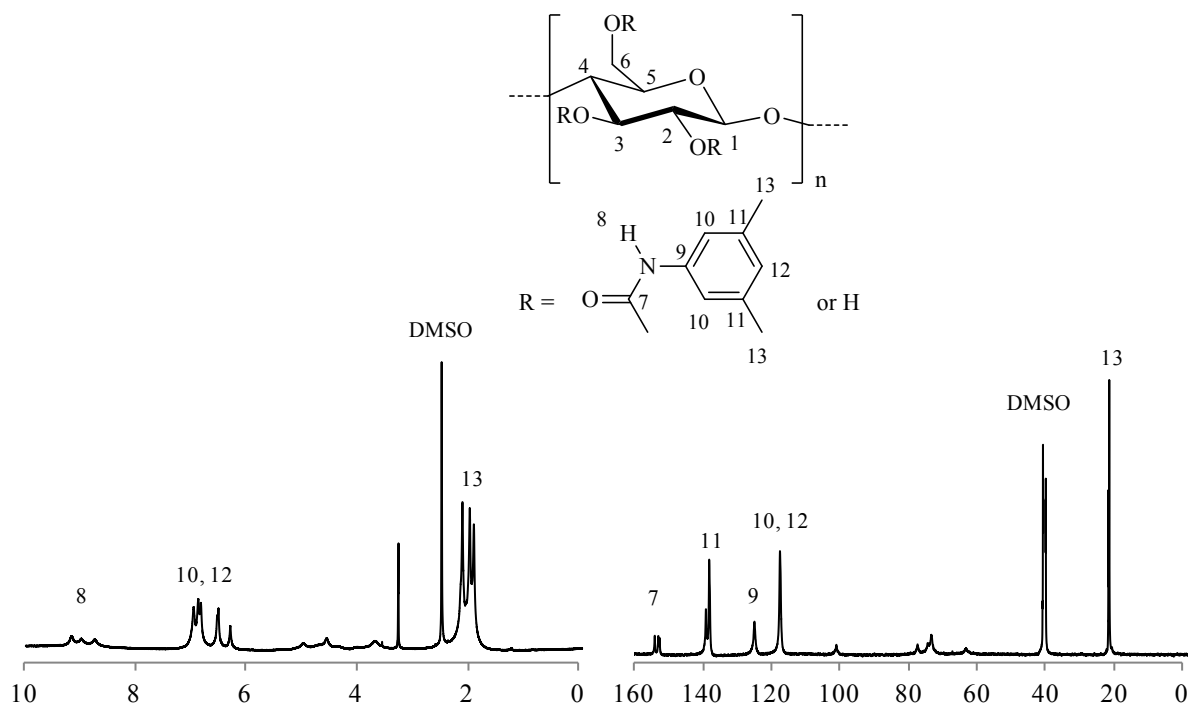

**Fig. 4**  $^1\text{H}$  and  $^{13}\text{C}$  NMR spectrum of treated MCC with 2,4-dimethylphenyl isocyanate.

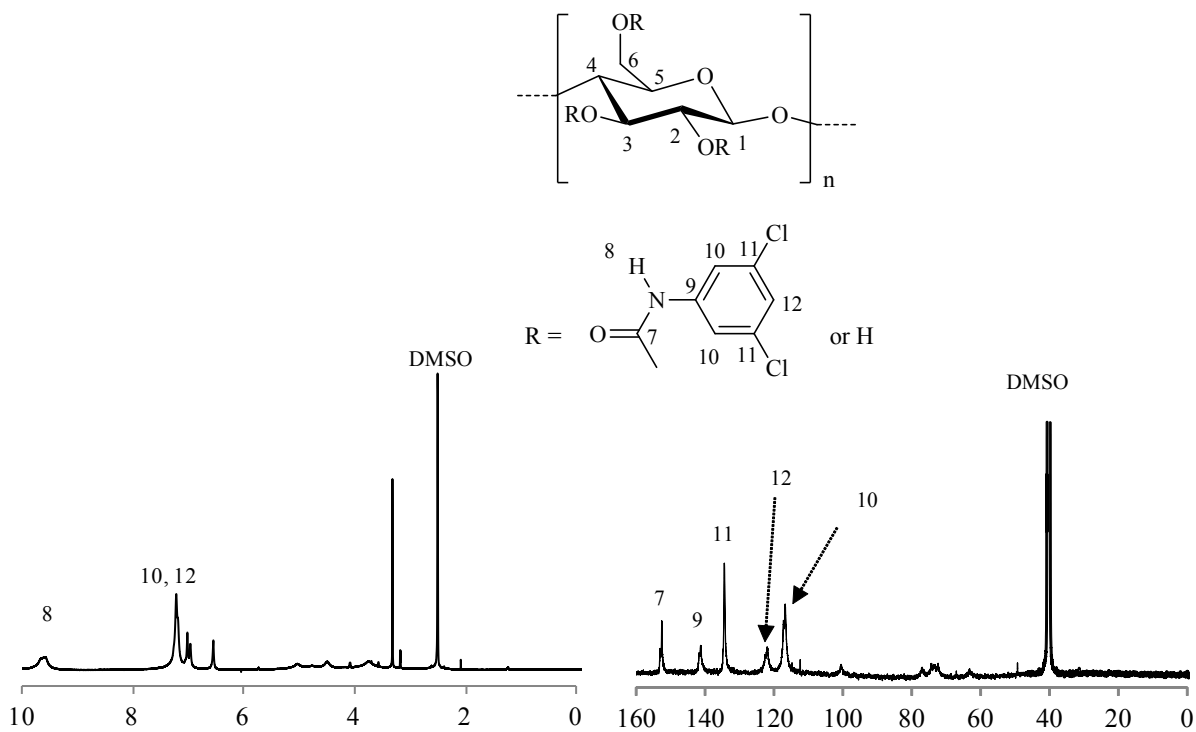

**Fig. 5**  $^1\text{H}$  and  $^{13}\text{C}$  NMR spectrum of treated MCC with 3,5-dichlorophenyl isocyanate.

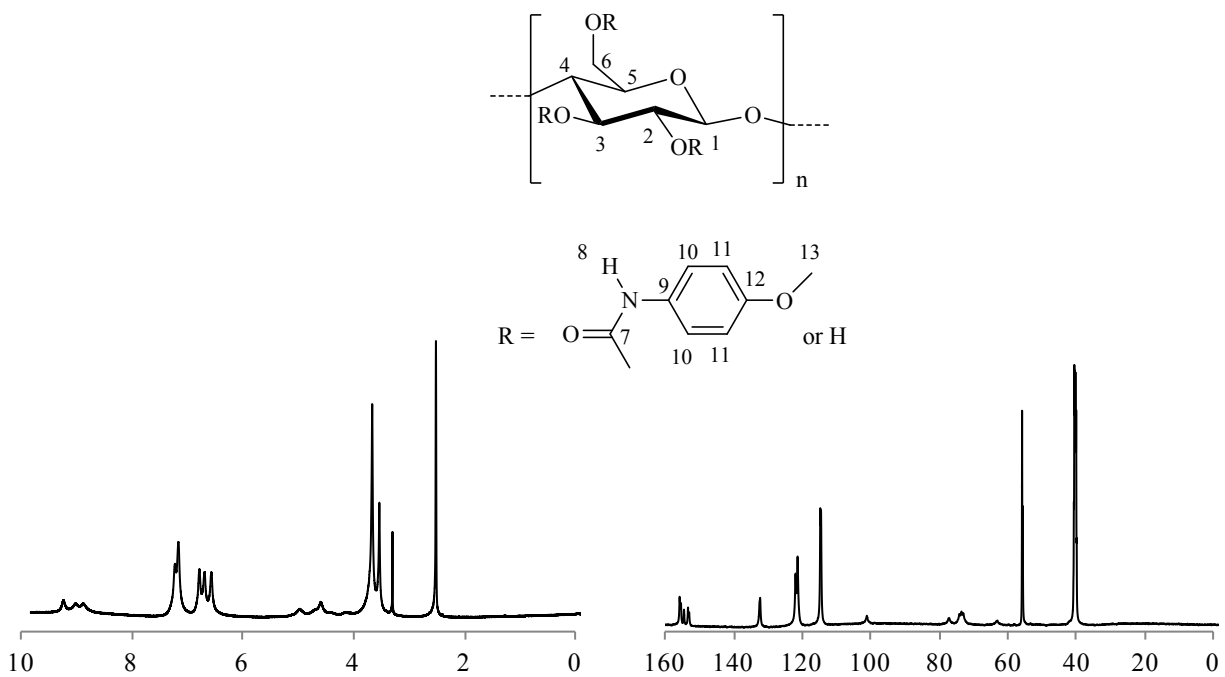

**Fig. 6** <sup>1</sup>H and <sup>13</sup>C NMR spectrum of treated MCC with 4-methoxyphenyl isocyanate.

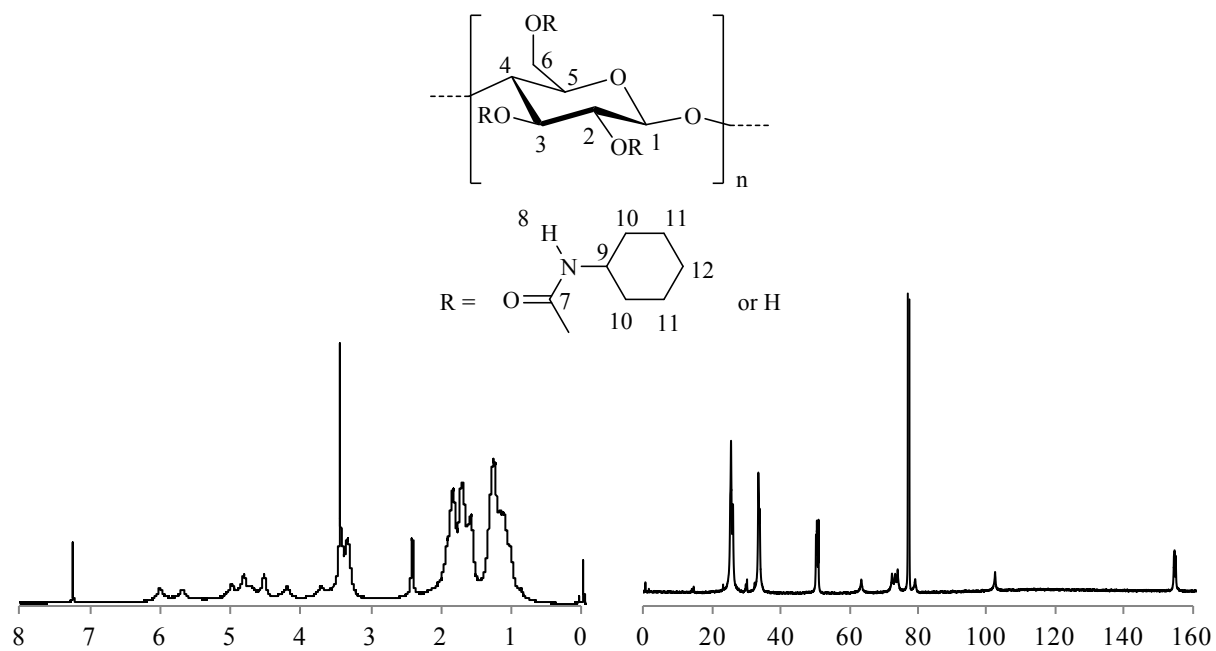

**Fig. 7** <sup>1</sup>H and <sup>13</sup>C NMR spectrum of treated MCC with cyclohexyl isocyanate.

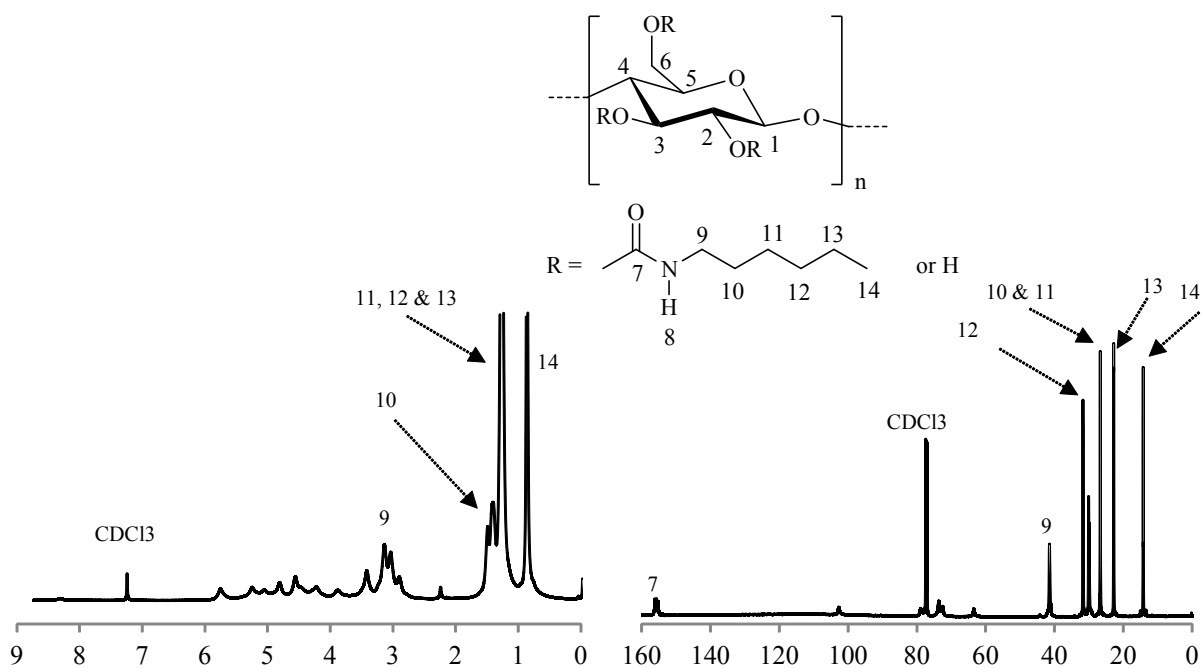

**Fig. 8**  $^1\text{H}$  and  $^{13}\text{C}$  NMR spectrum of treated MCC with hexyl isocyanate.

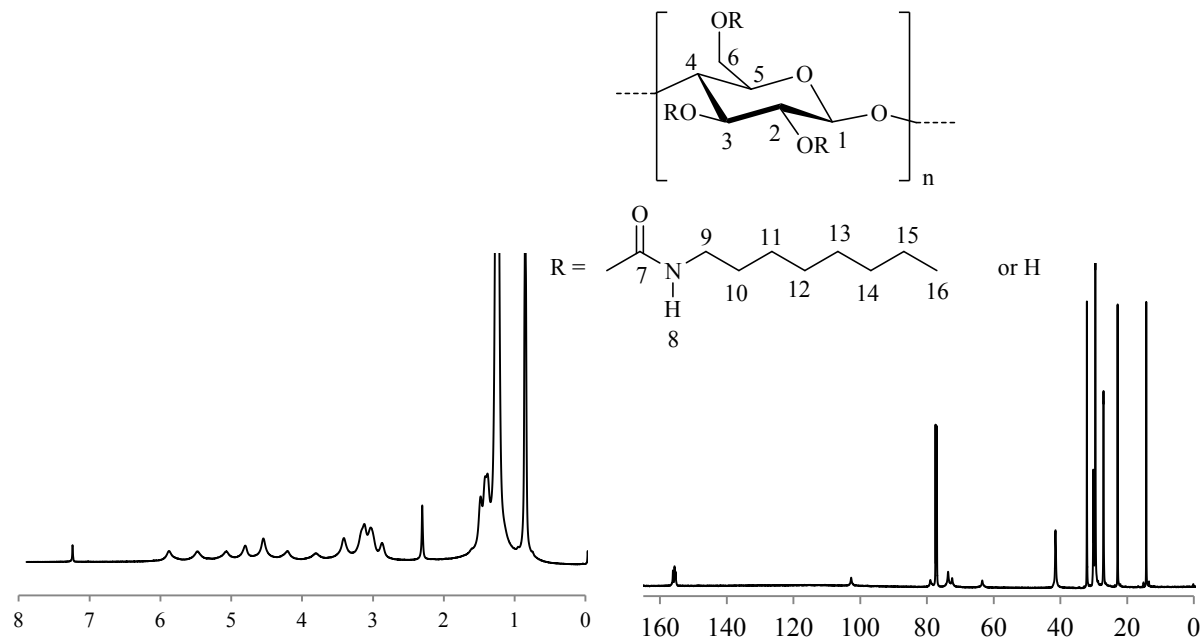

**Fig. 9**  $^1\text{H}$  and  $^{13}\text{C}$  NMR spectrum of treated MCC with octyl isocyanate.

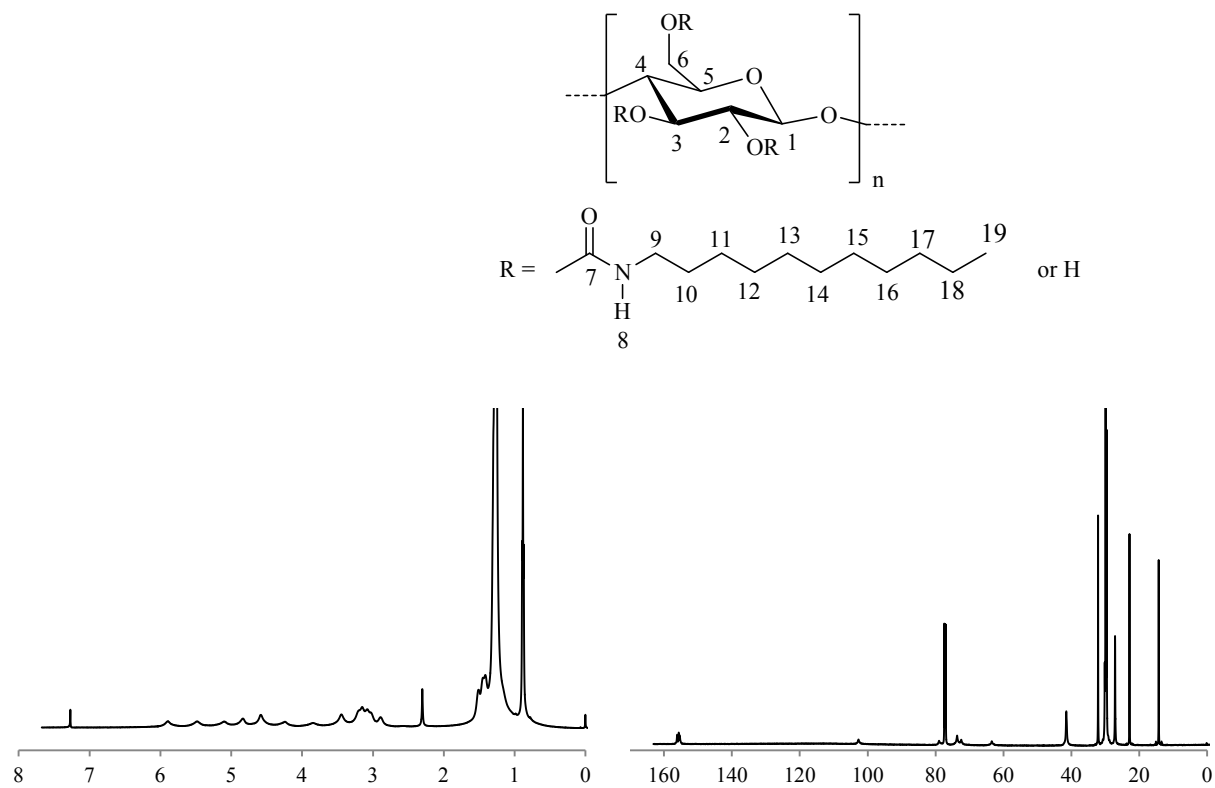

**Fig. 10**  $^1\text{H}$  and  $^{13}\text{C}$  NMR spectrum of treated MCC with undecyl isocyanate.

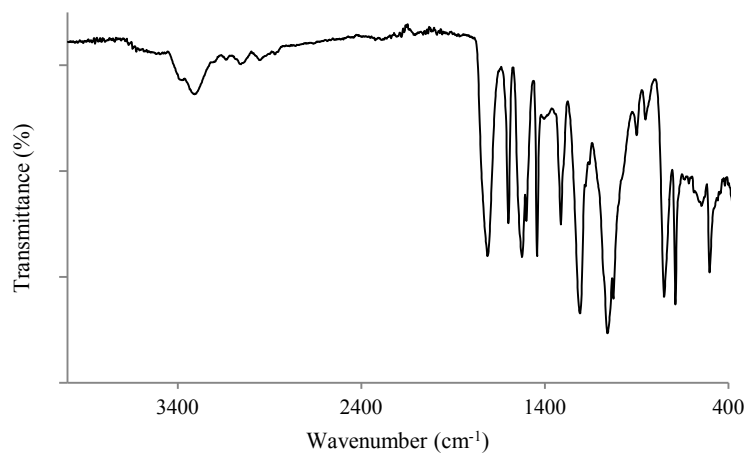

**Fig. 11** FTIR spectra of modified HKP with phenyl isocyanate.

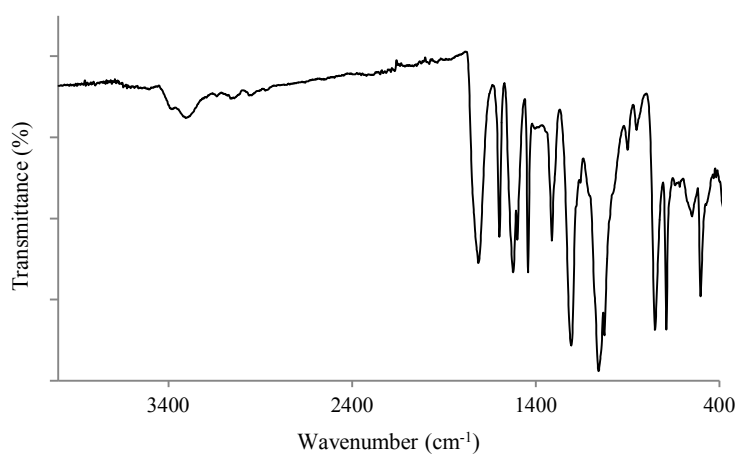

**Fig. 12** FTIR spectra of modified HPHKP with phenyl isocyanate.

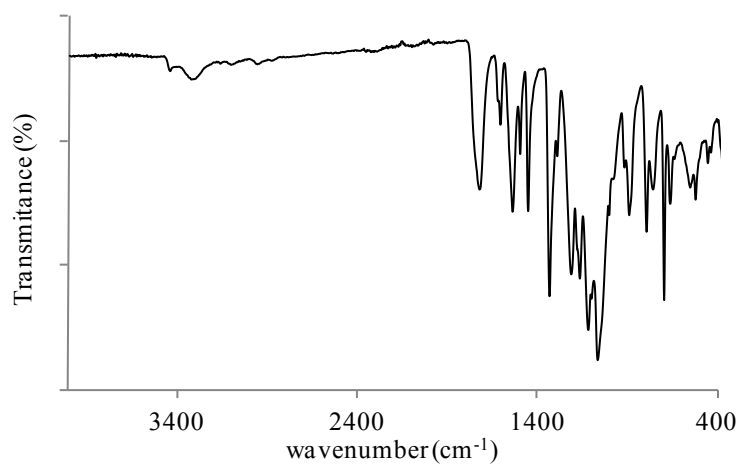

**Fig. 13** FTIR spectra of modified MCC with 3-(trifluoromethyl)phenyl isocyanate.



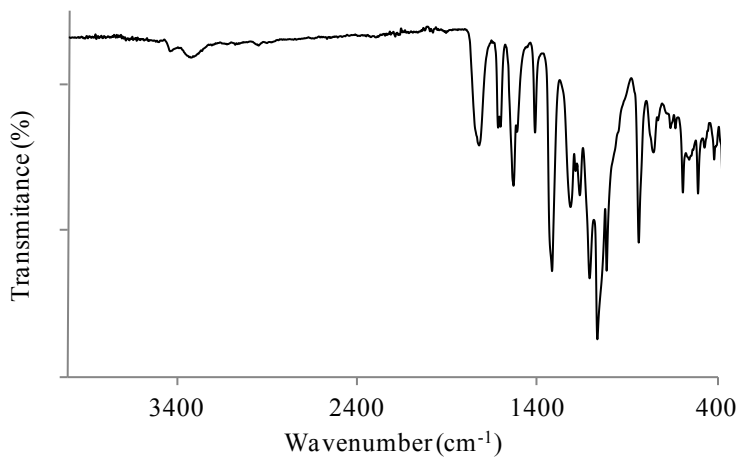

**Fig. 14** FTIR spectra of modified MCC with 4-(trifluoromethyl)phenyl isocyanate.

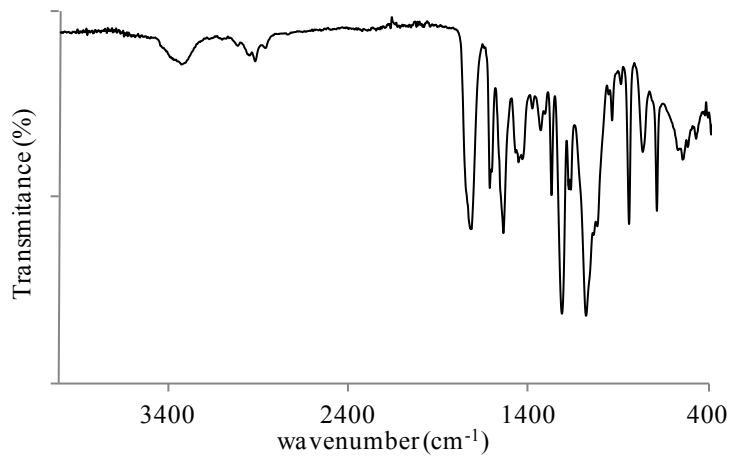

**Fig. 15** FTIR spectra of modified MCC with 2,4-dimethylphenyl isocyanate.

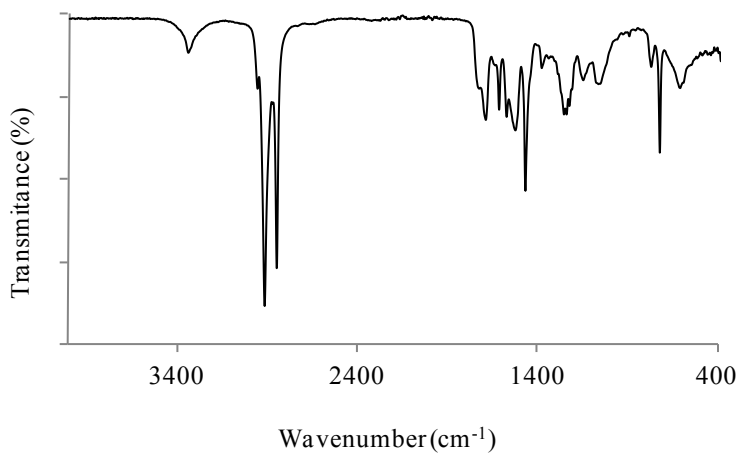

**Fig. 16** FTIR spectra of modified MCC with 3,5-dichlorophenyl isocyanate.

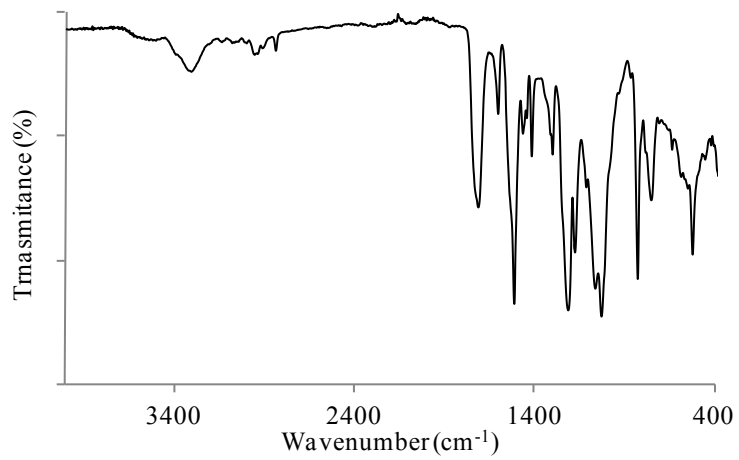

**Fig. 17** FTIR spectra of modified MCC with 4-methoxyphenyl isocyanate.

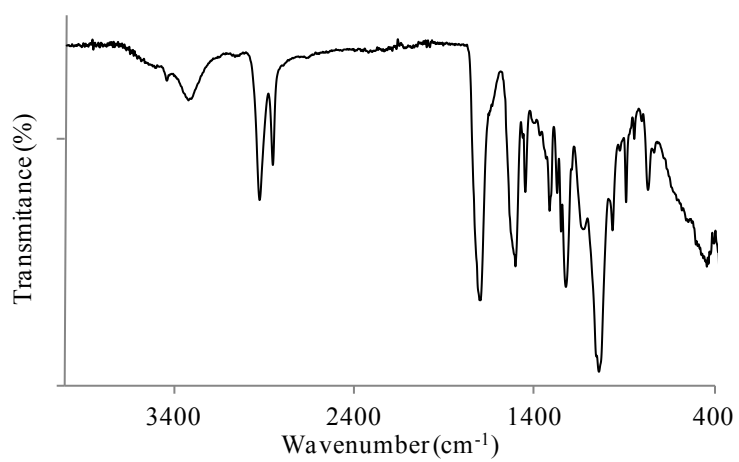

**Fig. 18** FTIR spectra of modified MCC with cyclohexyl isocyanate.

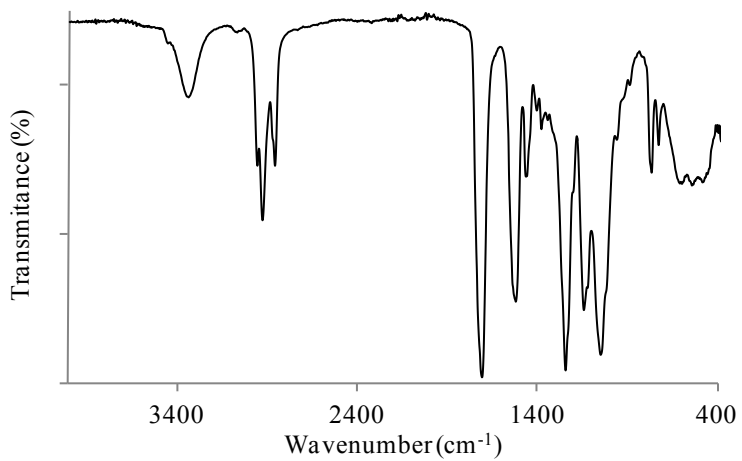

**Fig. 19** FTIR spectra of modified MCC with hexyl isocyanate.

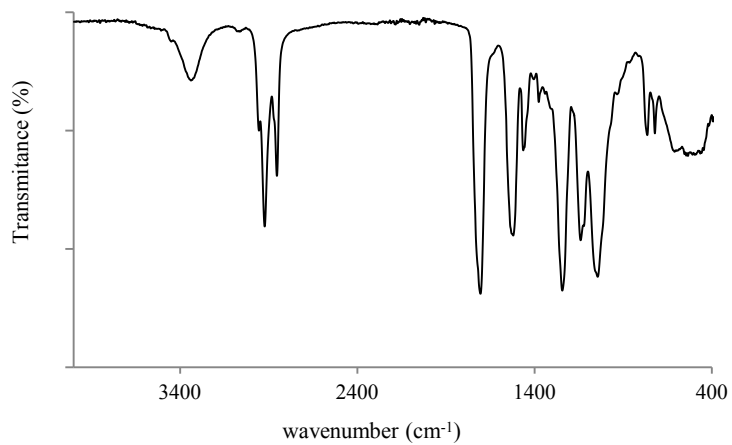

**Fig. 20** FTIR spectra of modified MCC with octyl isocyanate.

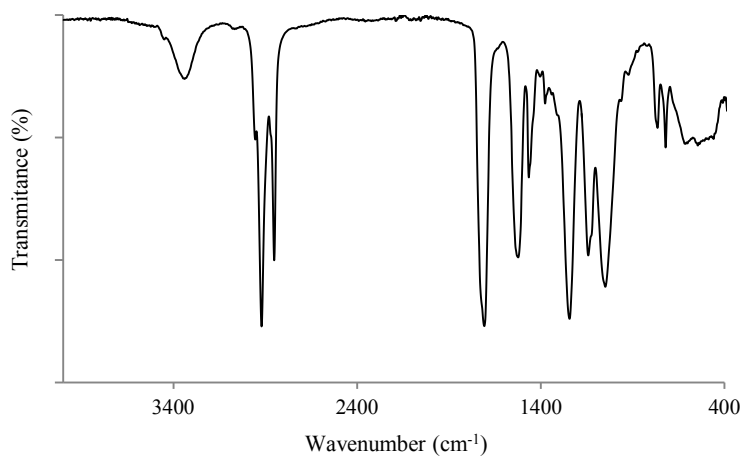

**Fig. 21** FTIR spectra of modified MCC with undecyl isocyanate.

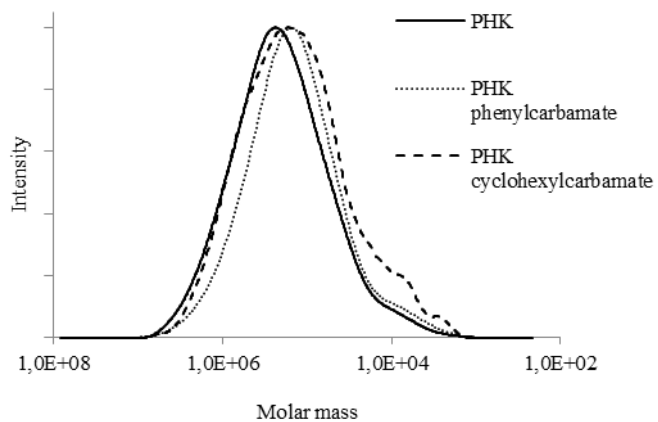

**Fig. 22** Molar mass distribution of unmodified and phenyl isocyanate modified PHK.

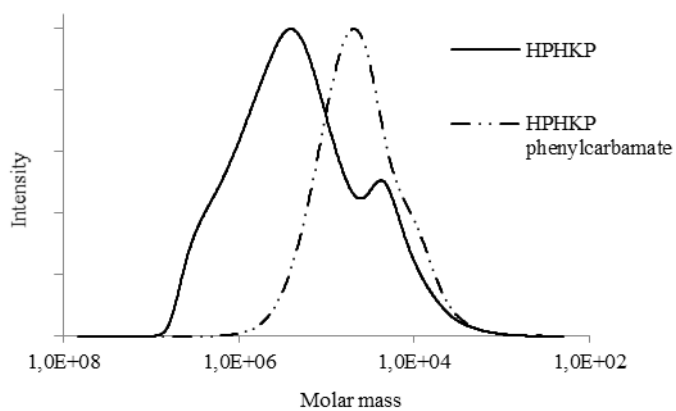

**Fig. 23** Molar mass distribution of unmodified and phenyl isocyanate modified HPHKP.

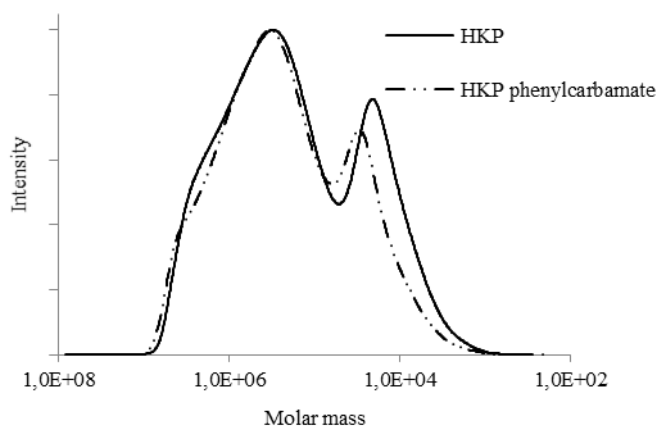

**Fig. 24** Molar mass distribution of unmodified and phenyl isocyanate modified HKP.

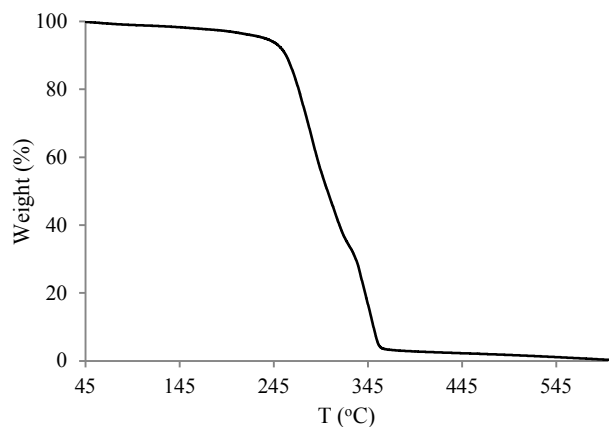

**Fig. 25** TGA curve of treated MCC with 3-(trifluoromethyl)phenyl isocyanate

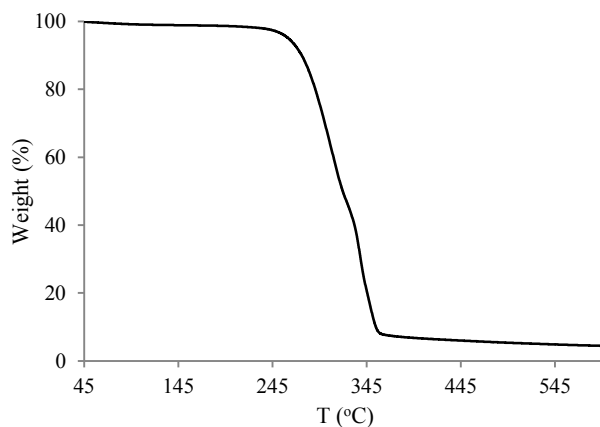

**Fig. 26** TGA curve of treated MCC with 4-(trifluoromethyl)phenyl isocyanate

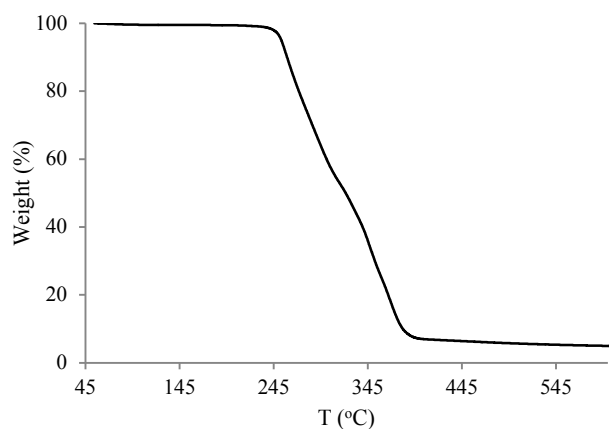

**Fig. 27** TGA curve of treated MCC with 2,4-dimethylphenyl isocyanate

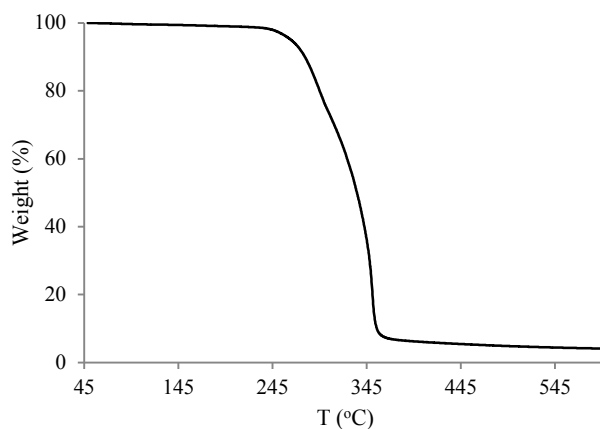

**Fig. 28** TGA curve of treated MCC with 3,5-dichlorophenyl isocyanate

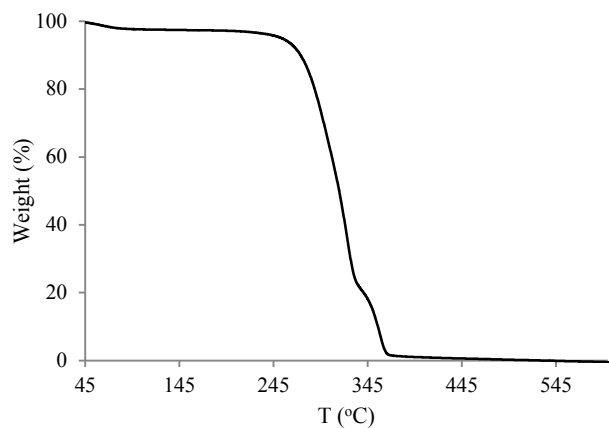

**Fig. 29** TGA curve of treated MCC with 4-methoxyphenyl isocyanate

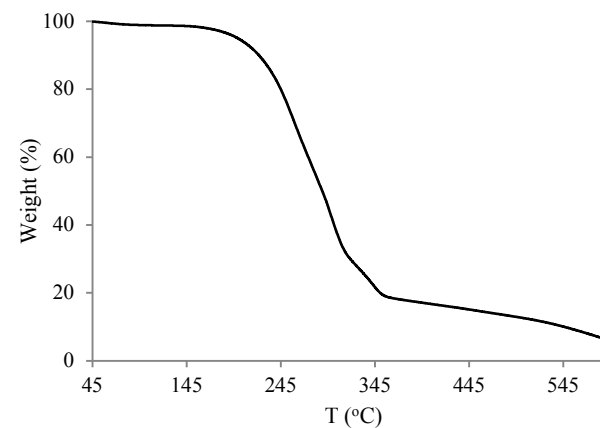

**Fig. 30** TGA curve of treated MCC with hexyl isocyanate

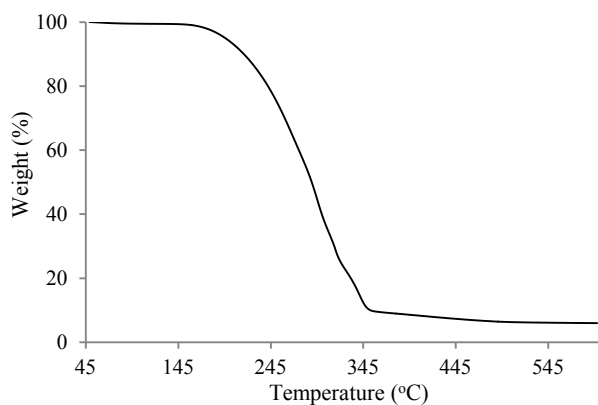

**Fig. 31** TGA curve of treated MCC with octyl isocyanate

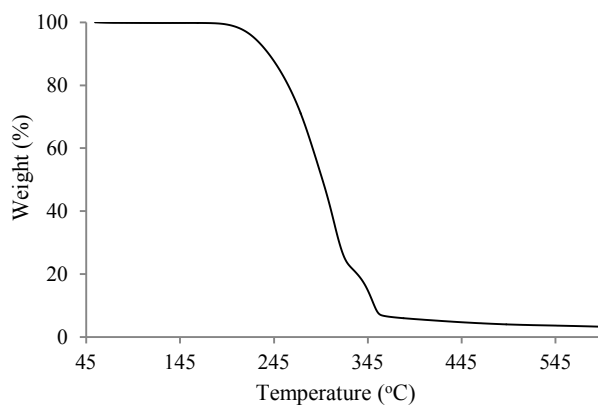

**Fig. 32** TGA curve of treated MCC with undecyl isocyanate

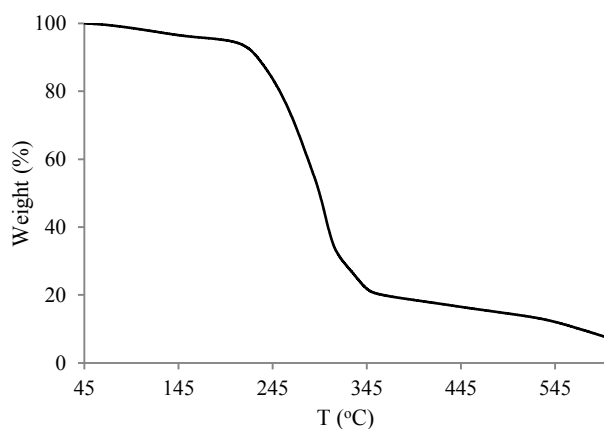

**Fig. 33** TGA curve of treated MCC with cyclohexyl isocyanate

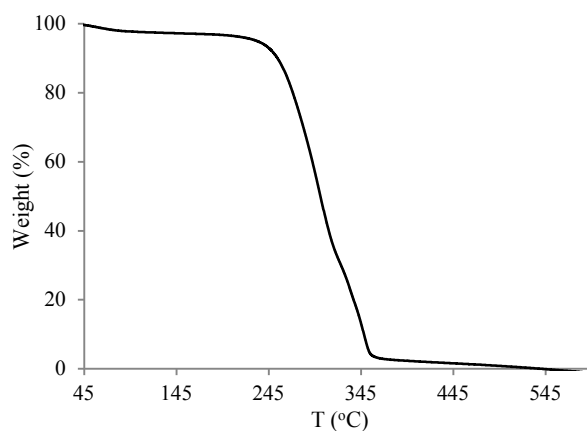

**Fig. 34** TGA curve of treated MCC with phenyl isocyanate

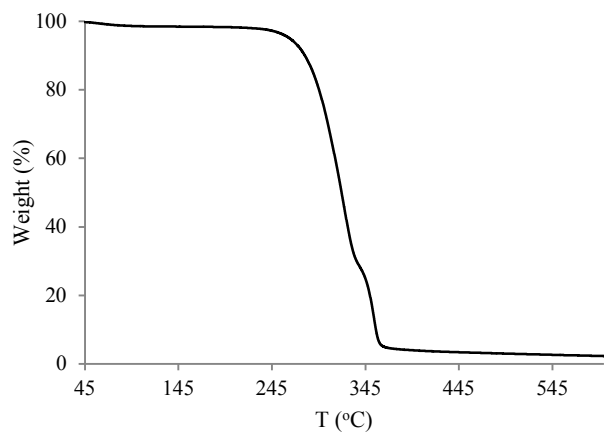

**Fig. 35** TGA curve of treated HKP with phenyl isocyanate

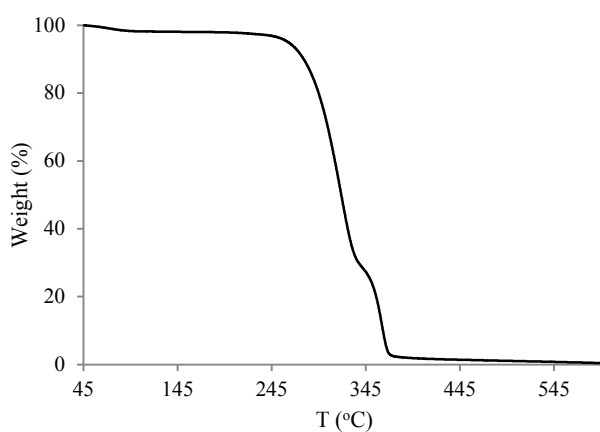

**Fig. 36** TGA curve of treated HPHKP with phenyl isocyanate

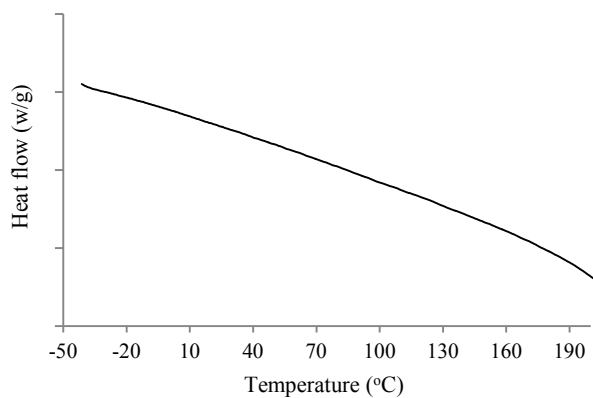

**Fig. 37** DSC analysis of modified MCC with phenyl isocyanate.

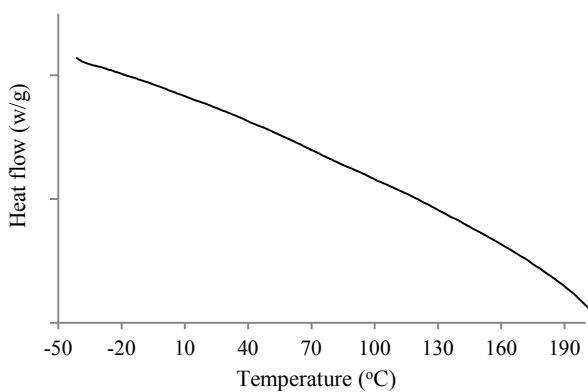

**Fig. 38** DSC analysis of modified PHK with phenyl isocyanate

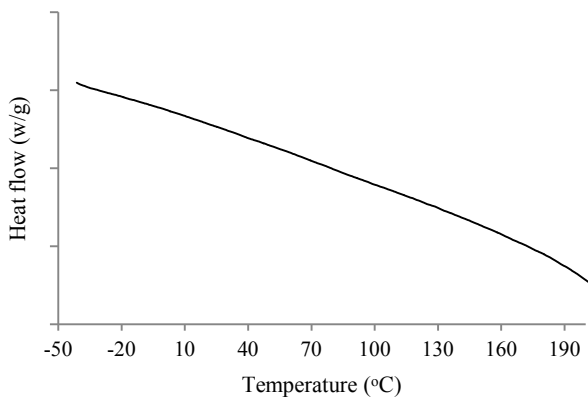

**Fig. 39** DSC analysis of modified HPHKP with phenyl isocyanate.

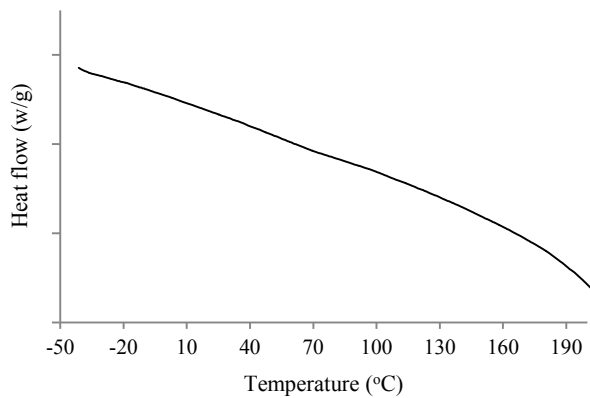

**Fig. 40** DSC analysis of modified HKP with phenyl isocyanate.

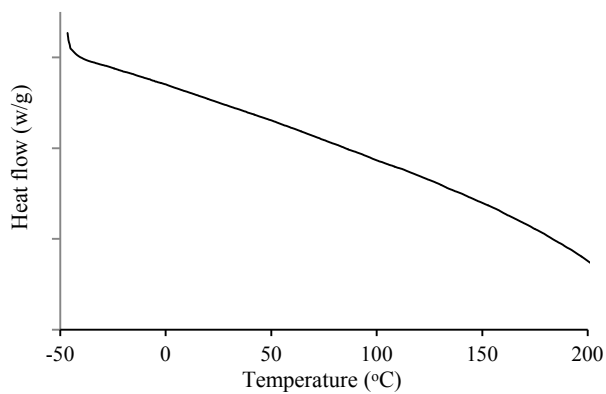

**Fig. 41** DSC analysis of modified MCC with 4-methoxyphenyl isocyanate.

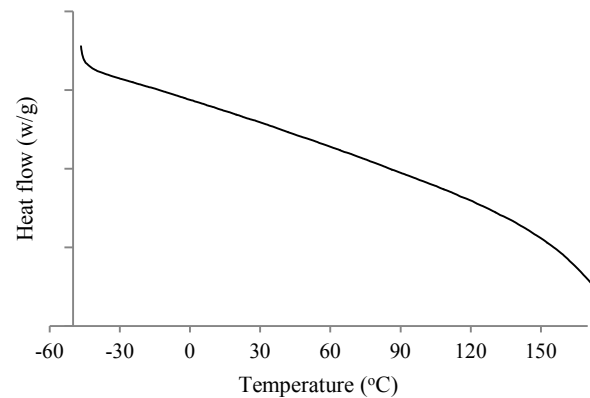

**Fig. 42** DSC analysis of modified MCC with cyclohexyl isocyanate.



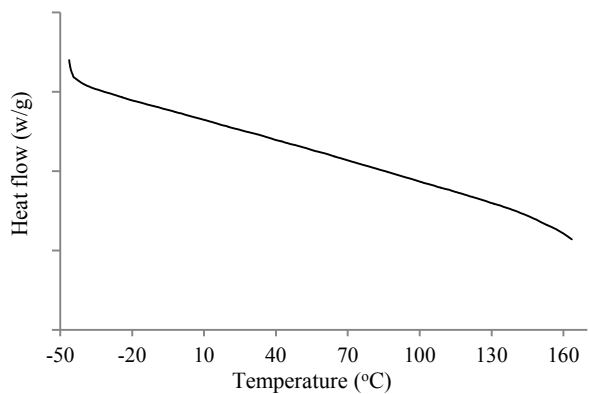

**Fig. 43** DSC analysis of modified MCC with hexyl isocyanate.

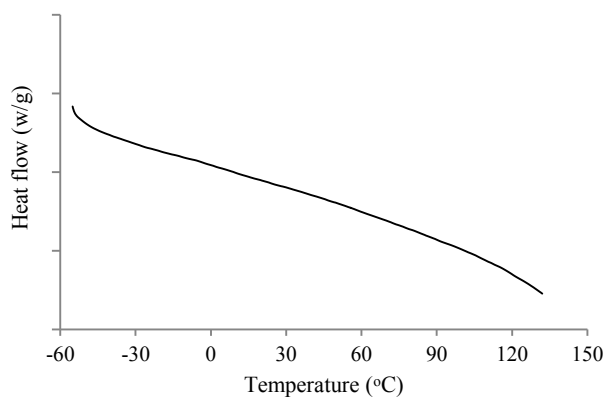

**Fig. 44** DSC analysis of modified MCC with octyl isocyanate.

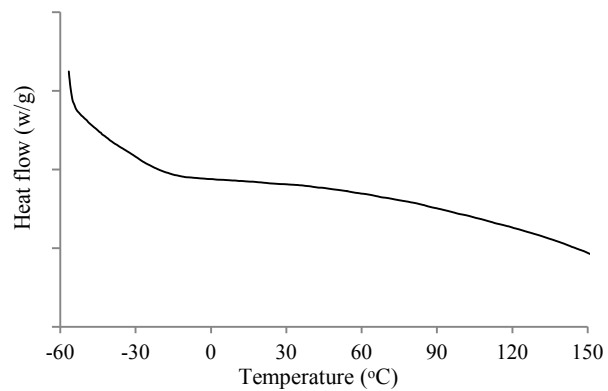

**Fig. 45** DSC analysis of modified MCC with undecyl isocyanate.
